# Supplementary material for: Residual risk of mother-to-child transmission of HBV despite timely Hepatitis B vaccination: a major challenge to eliminate hepatitis B infection in Cambodia
Source: Springer Nature journal article supplement (doi:10.1186/s12879-023-08249-1), 2023-04-26
Supplement: MOESM1 [file 25285544]

(a) Distribution of HBV viral load by HBeAg

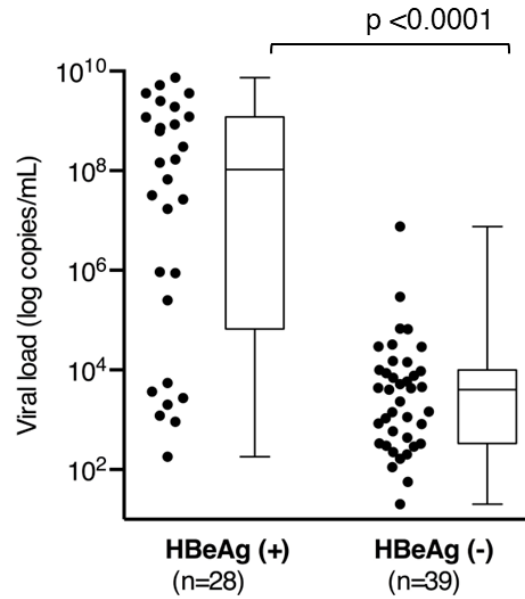

(b) Distribution of HBV viral load and HBeAg by age group

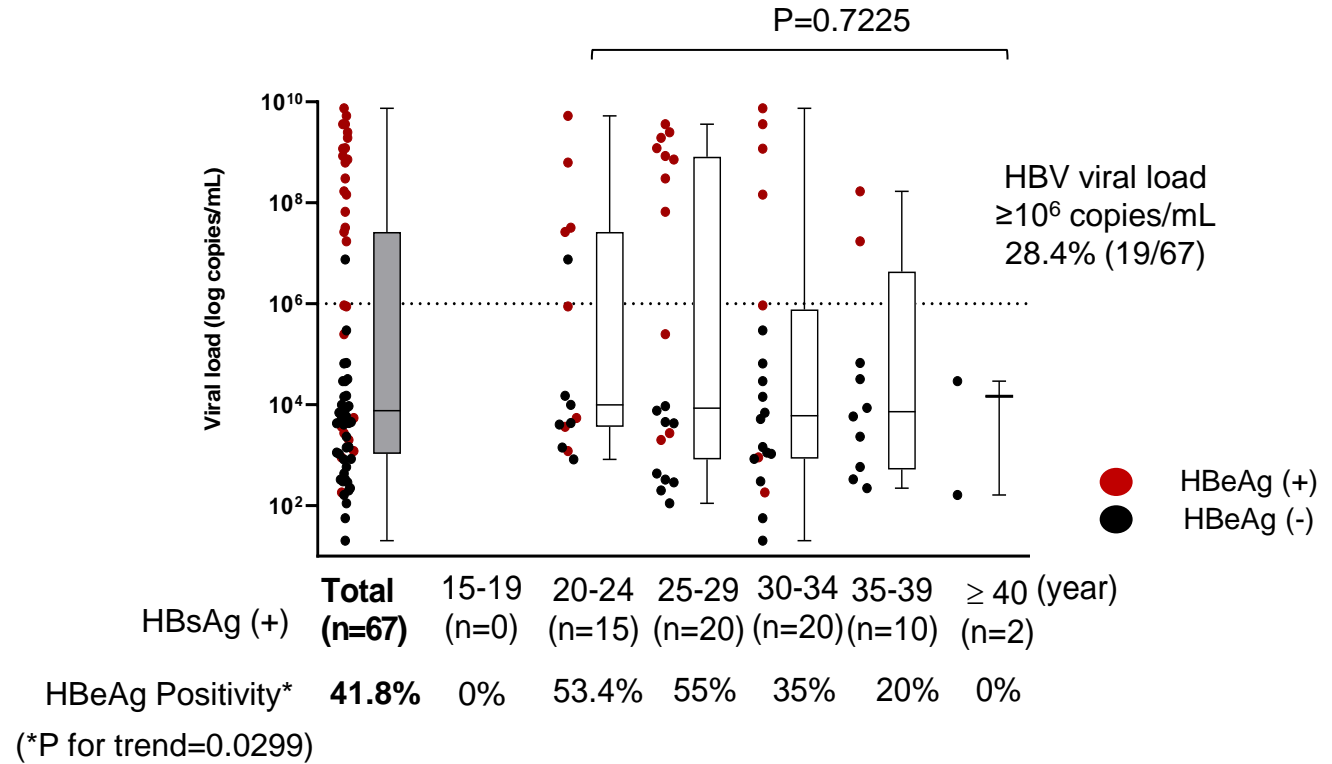

**Supplementary Figure 1:** Distribution of (a) HBV viral load by HBeAg and (b) HBV viral load and HBeAg by age group among the 67 HBsAg positive pregnant women
