# Supplementary material for: Residual risk of mother-to-child transmission of HBV despite timely Hepatitis B vaccination: a major challenge to eliminate hepatitis B infection in Cambodia
Source: Springer Nature journal article supplement (doi:10.1186/s12879-023-08249-1), 2023-04-26
Supplement: MOESM2 [file 25285544]

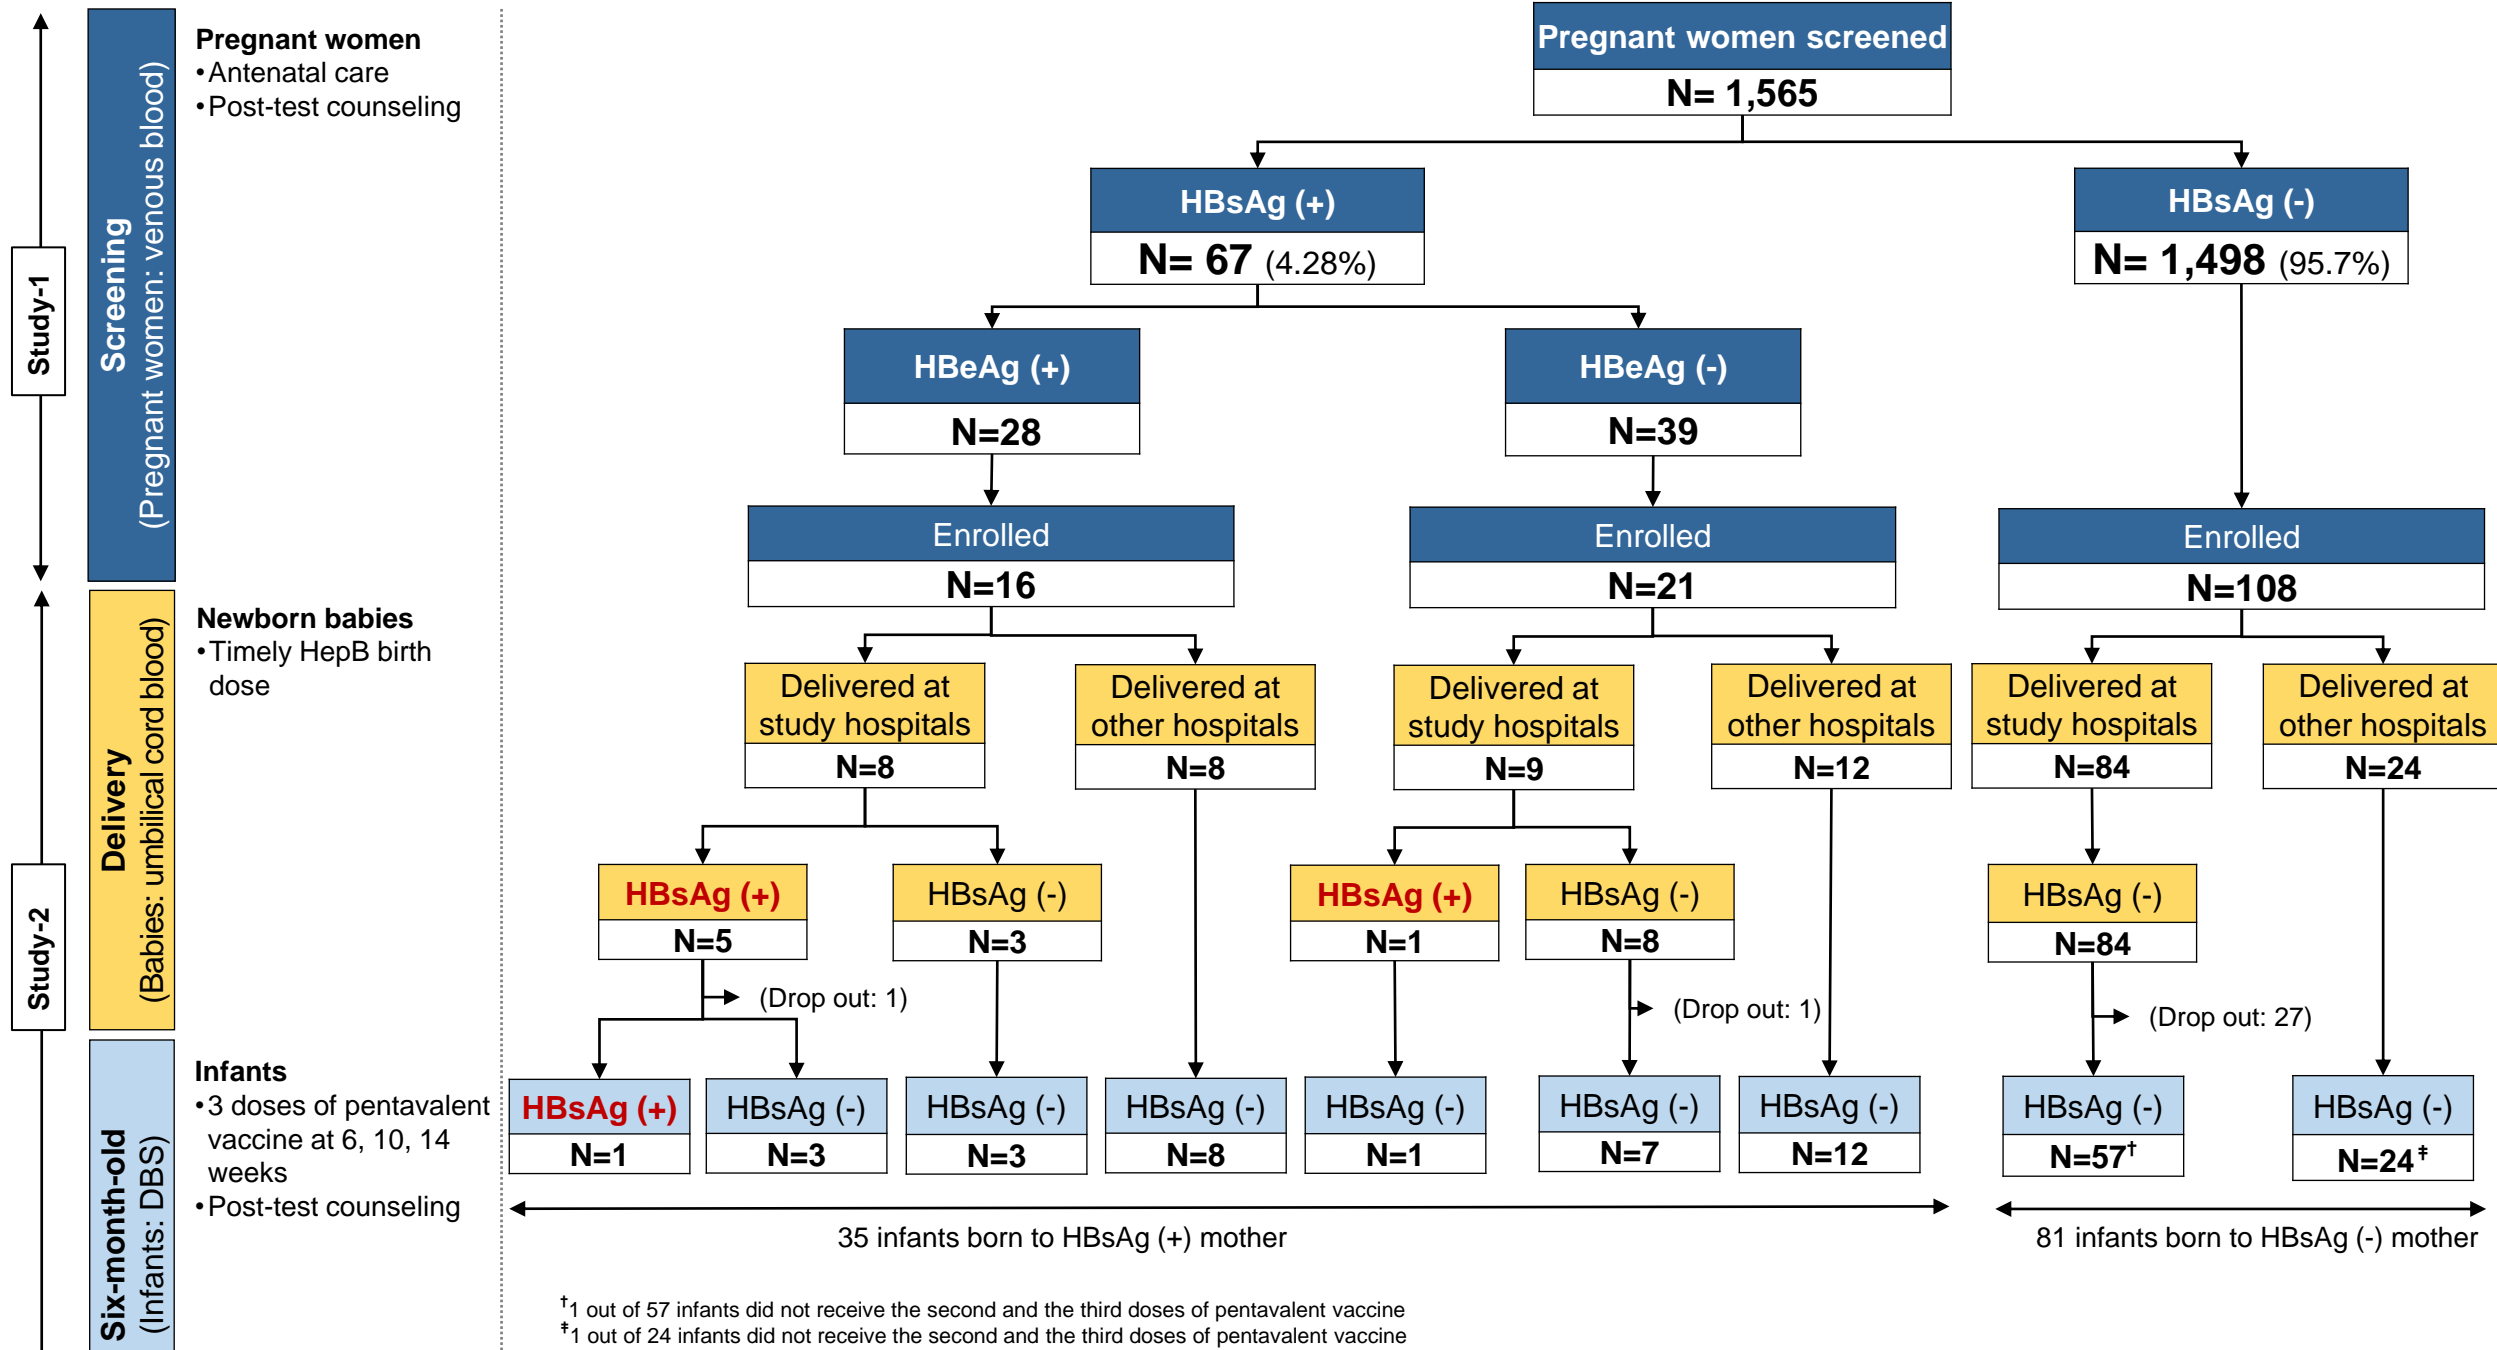

**Supplementary Figure 2: HBsAg status of infants at six-month-old stratified by maternal HBsAg and HBeAg**
